# Supplementary material for: Use of Natural Agents and Agrifood Wastes for the Treatment of Skin Photoaging
Source: MDPI journal article supplement (doi:10.3390/plants12040840), 2023-02-13
Supplement: s1 [file s1]

## Supporting information

### Use of natural agent and agrifood wastes to treatment of skin photoaging

by Melania Parisi<sup>1</sup>, et al.,

#### Regenerative Medicine Market 2021 to 2030

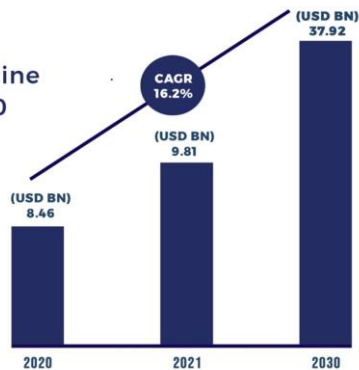

Source: [www.precedenceresearch.com](http://www.precedenceresearch.com)

#### ANTI-AGING MARKET SHARE, BY REGION, 2020 [%]

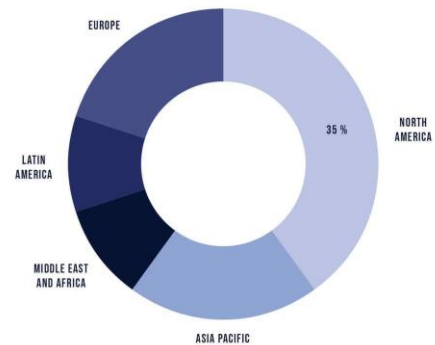

Source: [www.precedenceresearch.com](http://www.precedenceresearch.com)

#### Europe anti-aging market 2018-2027

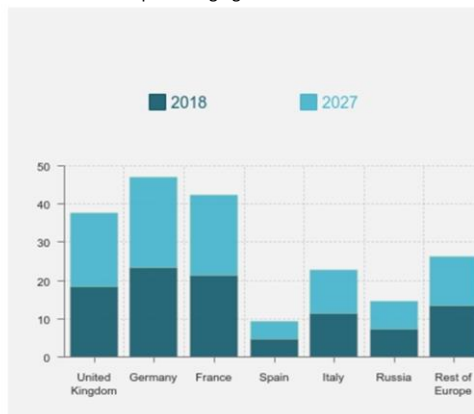

Source: [tritonmarkerresearch.com](http://tritonmarkerresearch.com)

#### Global Anti-Wrinkle Products Market By Nature, 2018 (US\$ Mn)

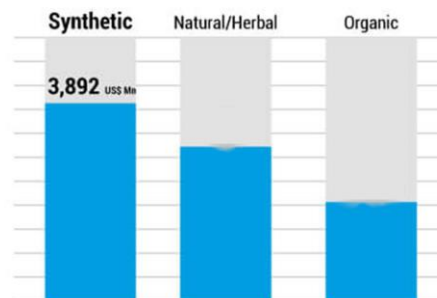

CAGR of 5.8%  
2018-2027

Source: [FMI.futuremarkerinsights.com](http://FMI.futuremarkerinsights.com)

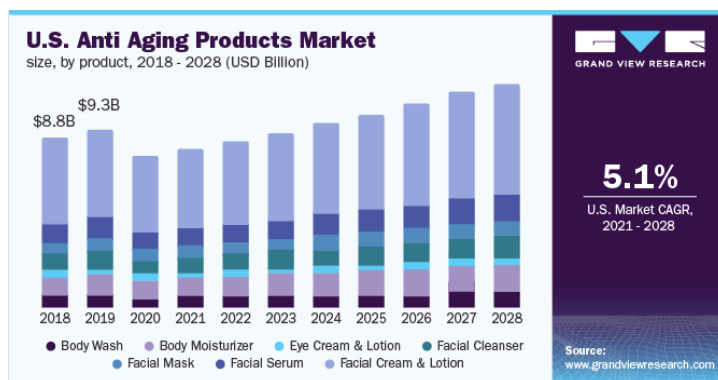

Source: [Anti Aging Products Market Size Report, 2021-2028](http://Anti Aging Products Market Size Report, 2021-2028) [grandviewresearch.com](http://grandviewresearch.com)

**Figure S1:** Exemplificative data on market trends of antiaging products from web sources
